# Supplementary material
Source: publisher figshare collection journal article supplement (https://tandf.figshare.com/ndownloader/files/38179808)
Supplement: Supplementary file 1 [file 38179808]

**Appendix Table 1. Characteristics of Participants in Cognitive Interview and Pilot Sample**

|  | **Cognitive**  **N=18** | **Pilot**  **N=15** |
| --- | --- | --- |
|  | **Mn (sd)** | **Mn (sd)** |
| Age (mn, sd) | 56.7 (12.5) | 60.5 (10.8 |
|  | **N (%)** | **N (%)** |
| Gender |  |  |
| Male | 9 (50.0) | 6 (40.0) |
| Female | 9 (50.0) | 9 (60.0)] |
| Amputation level |  |  |
| Transradial/wrist disarticulation | 9 (50.0) | 10 (66.7) |
| Transhumeral/elbow disarticulation | 7 (38.9) | 3 (20.0) |
| Shoulder | 2 (11.1) | 2 (13.3) |
| Bilateral upper limb loss | 2 (11.1) | 4 (26.7) |
| Primary prosthesis type |  |  |
| Body powered | 9 (50.0) | 6 (40.0) |
| Myoelectric | 6 (33.3) | 6 (40.0) |
| Hybrid | 0 (0.0) | 1 (6.7) |
| Cosmetic | 3 (16.7) | 1 (6.7) |
| Sports/recreation | 0 (0.0) | 1 (6.7) |
| Etiology |  |  |
| Combat injury | 1 (5.6) | 1 (6.7) |
| Accident | 6 (33.3) | 6 (40.0) |
| Burn | 1 (5.6) | 2 (13.3) |
| Cancer | 2 (11.1) | 1 (6.7) |
| Diabetes | 0 (0.0) | 0 (0.0) |
| Infection | 3 (16.7) | 1 (7.7) |
| Congenital | 3 (16.7) | 5 (33.3) |
| Other | 2 (11.1) | 2 (13.3) |
| Race |  |  |
| White | 15 (83.3) | 9 (69.2) |
| Black | 2 (11.1) | 1 (7.7) |
| Other | 1 (5.6) | 3 (23.1) |

**Appendix Table 2. Task completion with prosthesis by laterality**

|  | # with response | Unilateral Group (N=389) | | Bilateral Group (N=34) | | All (N=423) |
| --- | --- | --- | --- | --- | --- | --- |
|  | N | | N (%) | | N (%) | N (%) |
| **One-handed tasks** |  | |  | |  |  |
| Wash your face with the assistance of your prosthesis. | 422 | | 29 (7.5) | | 16 (47.1) | 45 (10.7) |
| Brush or comb your hair. | 421 | | 25 (6.4) | | 17 (51.5) | 42 (10.0) |
| Put on underwear with the assistance of your prosthesis. | 421 | | 123 (31.6) | | 16 (50.0) | 139 (33.0) |
| Put on and remove a T-shirt with the assistance of your prosthesis. | 423 | | 111 (28.5) | | 14 (41.2) | 125 (29.6) |
| Drink from a paper cup with the assistance of your prosthesis. | 423 | | 62 (15.9) | | 24 (70.6) | 86 (20.3) |
| Eat with a fork or spoon with the assistance of your prosthesis. | 423 | | 92 (23.7) | | 31 (91.2) | 123 (29.1) |
| Write your name legibly with the assistance of your prosthesis. | 421 | | 47 (12.1) | | 29 (85.3) | 76 (18.1) |
| Use a key in a lock with the assistance of your prosthesis. | 421 | | 63 (16.3) | | 21 (61.8) | 84 (20.0) |
| Open a door with a round knob with the assistance of your prosthesis. | 420 | | 79 (20.5) | | 23 (67.7) | 102 (24.3) |
| Lift a shopping bag containing about 10 pounds, using your prosthesis only. | 420 | | 223 (57.8) | | 22 (64.7) | 245 (58.3) |
| Lift a shopping bag containing about 20 pounds, using your prosthesis. | 417 | | 154 (40.1) | | 15 (45.5) | 169 (40.5) |
| **Two-handed tasks** |  | |  | |  |  |
| Put toothpaste on a brush and brush your teeth. | 423 | | 101 (26.0) | | 14 (41.2) | 115 (27.2) |
| Fold a bath towel with the assistance of your prosthesis. | 421 | | 187 (48.2) | | 18 (54.6) | 205 (48.7) |
| Fasten a bra with the assistance of your prosthesis. | 82 | | 15 (20.8) | | 1 (10.0) | 16 (19.5) |
| Button a shirt with front buttons with the assistance of your prosthesis. | 423 | | 85 (21.9) | | 7 (20.6) | 92 (21.8) |
| Put on socks with the assistance of your prosthesis. | 422 | | 111 (28.5) | | 15 (45.5) | 126 (29.9) |
| Tie shoelaces with the assistance of your prosthesis. | 422 | | 184 (47.3) | | 8 (24.2) | 192 (45.5) |
| Attach the end of a zipper and zip a jacket with the assistance of your prosthesis. | 423 | | 181 (46.5) | | 12 (35.3) | 193 (45.6) |
| Eat a deli sandwich with the assistance of your prosthesis. | 423 | | 44 (11.3) | | 16 (47.1) | 60 (14.2) |
| Cut meat with a knife and fork with the assistance of your prosthesis. | 422 | | 227 (58.5) | | 17 (50.0) | 244 (57.8) |
| Chop vegetables at a counter with the assistance of your prosthesis. | 422 | | 161 (41.5) | | 15 (44.1) | 176 (41.7) |
| Spread peanut butter on fresh bread, using your prosthesis. | 421 | | 86 (22.2) | | 12 (36.4) | 98 (23.3) |
| Pour from a 12 ounce can with the assistance of your prosthesis without spilling or crushing it. | 421 | | 84 (21.7) | | 19 (57.6) | 103 (24.5) |
| Hold a small bottle to twist off the lid with the assistance of your prosthesis. | 422 | | 214 (55.2) | | 18 (52.9) | 232 (55.0) |
| Hold a bowl to stir with the assistance of your prosthesis. | 420 | | 169 (43.8) | | 14 (41.2) | 183 (43.6) |
| Hold potatoes or fruit to peel them with the assistance of your prosthesis. | 421 | | 113 (29.2) | | 7 (20.6) | 120 (28.5) |
| Open a bag of chips using both hands with the assistance of your prosthesis. | 421 | | 186 (48.1) | | 18 (52.9) | 204 (48.4) |
| Hold an envelope to open it with the assistance of your prosthesis. | 420 | | 205 (53.1) | | 21 (61.8) | 226 (53.8) |
| Type on a computer keyboard with the assistance of your prosthesis. | 421 | | 76 (19.6) | | 19 (55.9) | 95 (22.6) |
| Take a dollar bill out of a wallet with the assistance of your prosthesis. | 420 | | 142 (36.8) | | 23 (67.7) | 165 (39.3) |
| Use scissors with the assistance of your prosthesis. | 420 | | 40 (10.3) | | 13 (39.4) | 53 (12.6) |
| Hold a nail to hammer with the assistance of your prosthesis. | 421 | | 159 (41.1) | | 5 (14.7) | 164 (39.0) |
| Carry a laundry basket with the assistance of your prosthesis. | 420 | | 257 (66.4) | | 19 (57.6) | 276 (65.7) |
| Lift and carry bulky objects like grocery bags or crates that weigh more than 15 pounds, using your prosthesis. | 419 | | 200 (51.8) | | 14 (42.2) | 214 (51.1) |
